# Supplementary material
Source: MDPI journal article supplement (https://www.mdpi.com/2379-139X/10/5/59)

Here, we present the results obtained with the Levenberg-Marquardt fit. The fit was initialized with  $S_0 = 40$ ,  $f = 0.01$ ,  $D = 1 \mu\text{m}^2/\text{ms}$ , and  $D^* = 10 \mu\text{m}^2/\text{ms}$ . Since the standard deviation of the fitted parameters was much larger than for the segmented fit, the Table shows the median values. The fit nonetheless supports the main finding  $f$  is considerably smaller at 7 T.

|                                   | <b>B<sub>0</sub> (T)</b> | <b>GM<sub>Baseline</sub></b> | <b>GM<sub>Activation</sub></b> | <b>TA<sub>Baseline</sub></b> | <b>TA<sub>Activation</sub></b> |
|-----------------------------------|--------------------------|------------------------------|--------------------------------|------------------------------|--------------------------------|
| $f$ (%)                           | 0.55                     | 8.37                         | 14.31                          | 4.51                         | 5.84                           |
|                                   | 7                        | 3.13                         | 4.85                           | 4.41                         | 4.55                           |
| $D$ ( $\mu\text{m}^2/\text{ms}$ ) | 0.55                     | 1.35                         | 1.46                           | 1.64                         | 1.62                           |
|                                   | 7                        | 1.45                         | 1.52                           | 1.63                         | 1.62                           |

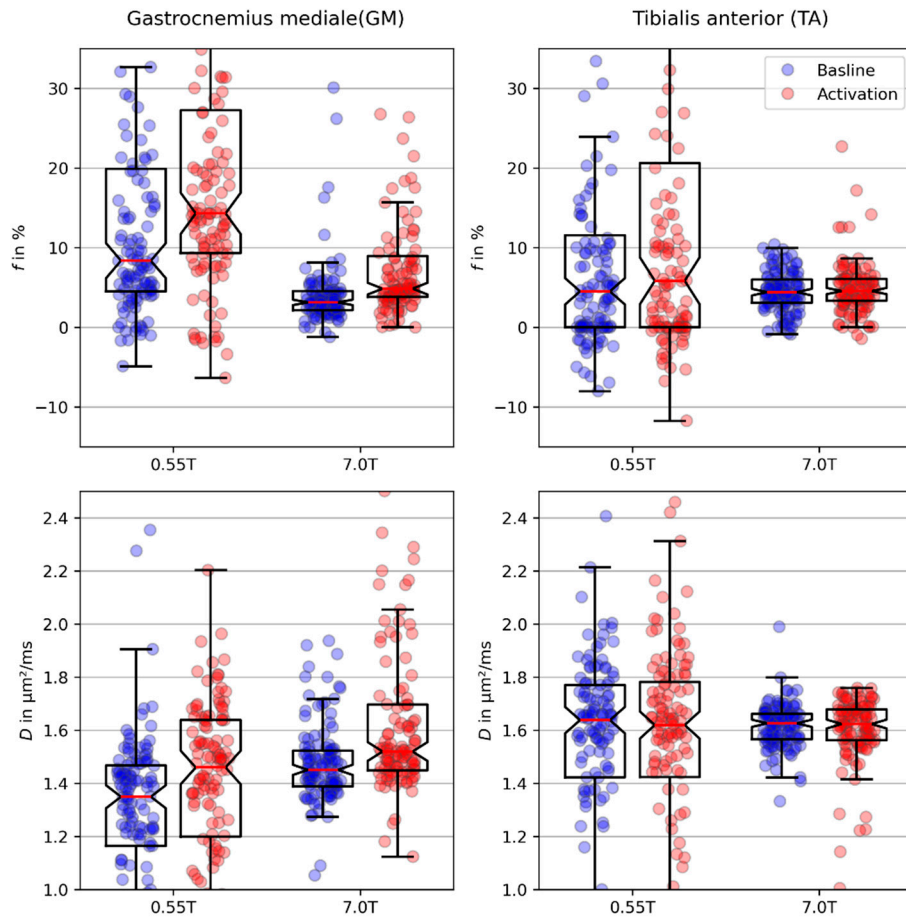

Supplement: s1 [file s1]
